# Supplementary material
Source: PubMed Central journal article supplement (PMC5559898)
Supplement: NIHMS889078-supplement-Supplemental_table.pdf [file NIHMS889078-supplement-Supplemental_table.pdf]

**Supplementary table 1**

| <b>Normal (N) vs.<br/>preeclampsia (P)</b> | <b>Week of<br/>gestation at<br/>delivery</b> | <b>EETs<br/>(ng/mg of tissue)</b> |
|--------------------------------------------|----------------------------------------------|-----------------------------------|
| N1                                         | 37                                           | 1,75                              |
| N2                                         | 37                                           | 1,33                              |
| N3                                         | 37                                           | 1,33                              |
| N4                                         | 37                                           | 0,85                              |
| N5                                         | 37                                           | 1,52                              |
| N6                                         | 38                                           | 1,92                              |
| N7                                         | 38                                           | 2,56                              |
| N8                                         | 38                                           | 1,15                              |
| N9                                         | 38                                           | 0,77                              |
| N10                                        | 38                                           | 0,27                              |
| N11                                        | 38                                           | 0,37                              |
| N12                                        | 38                                           | 0,19                              |
| N13                                        | 38                                           | 1,25                              |
| N14                                        | 38                                           | 2,79                              |
| N15                                        | 39                                           | 1,02                              |
| N16                                        | 39                                           | 1,69                              |
| N17                                        | 39                                           | 0,67                              |
| N18                                        | 39                                           | 0,36                              |
| N19                                        | 39                                           | 1,12                              |
| P1                                         | 28                                           | 2,40                              |
| P2                                         | 31                                           | 1,46                              |
| P3                                         | 32                                           | 3,20                              |
| P4                                         | 33                                           | 1,12                              |
| P5                                         | 33                                           | 2,02                              |
| P6                                         | 34                                           | 4,16                              |
| P7                                         | 34                                           | 1,77                              |
| P8                                         | 35                                           | 5,26                              |
| P9                                         | 38                                           | 1,12                              |
| P10                                        | 40                                           | 1,17                              |
